# Supplementary material
Source: PubMed Central journal article supplement (PMC3758834)
Supplement: NIHMS92620-supplement-03.pdf [file NIHMS92620-supplement-03.pdf]

Supplementary Table 1. Regions of significant activation and deactivation during stimulation by real and latex hand touch.

| Cortical Areas (within cluster)                                                                                                                                           | BA                          | L/R | Coordinates (center of cluster) <sup>°</sup> |     |     | Cluster Volume (μL) | t-value |
|---------------------------------------------------------------------------------------------------------------------------------------------------------------------------|-----------------------------|-----|----------------------------------------------|-----|-----|---------------------|---------|
|                                                                                                                                                                           |                             |     | x                                            | y   | z   |                     |         |
| Middle/Inferior Frontal Gyrus, Insula, Parahippocampal Gyrus, Amygdala, Claustrum, Thalamus, Caudate, Putamen, Postcentral Gyrus, Inferior/Middle/Superior Temporal Gyrus | 1, 2, 3, 13, 40, 44, 45, 46 | R   | 44                                           | -24 | 24  | 45888               | 10.85   |
| Pre/Postcentral Gyrus, Paracentral Lobule, Medial Frontal Gyrus*                                                                                                          | 3, 4, 6                     | L/R | -12                                          | -28 | 57  | 20224               | -8.64   |
| Inferior Parietal Lobule, Supramarginal Gyrus, Postcentral Gyrus, Superior Temporal Gyrus                                                                                 | 13, 40                      | L   | -51                                          | -32 | 33  | 16512               | 9.45    |
| Posterior Cingulate, Cuneus*                                                                                                                                              | 18                          | L/R | -8                                           | -57 | 17  | 11328               | -12.07  |
| Insula                                                                                                                                                                    | 13                          | L   | -37                                          | -2  | 6   | 6208                | 9.59    |
| Middle Temporal Gyrus, Inferior Frontal Gyrus                                                                                                                             | 37                          | L   | -50                                          | -60 | 8   | 2880                | 7.39    |
| Middle Occipital Gyrus*                                                                                                                                                   | 18                          | R   | 33                                           | -82 | 5   | 1664                | -11.35  |
| Inferior Semi-Lunar Lobule, Cerebellar Tonsil, Pyramis, Uvula                                                                                                             |                             | L   | -18                                          | -70 | -30 | 1600                | 6.15    |

<sup>°</sup> Whole brain,  $p < 0.001$  threshold. All coordinates are Talairach coordinates (x, y, z). Cortical areas are based on Talairach Daemon software <sup>1</sup>.

\* Indicates that the region of interest displays significant deactivation during stimulation as compared to baseline.
