# Supplementary material
Source: PubMed Central journal article supplement (PMC3758834)
Supplement: NIHMS92620-supplement-04.pdf [file NIHMS92620-supplement-04.pdf]

Supplementary Table 2. Regions of significant activation and deactivation during anticipation of real and latex stimuli.

| Cortical Areas (within cluster)                                                        | BA              | L/R | Coordinates (center of cluster) <sup>o</sup> |     |    | Cluster Volume ( $\mu$ L) | t-value |
|----------------------------------------------------------------------------------------|-----------------|-----|----------------------------------------------|-----|----|---------------------------|---------|
|                                                                                        |                 |     | x                                            | y   | z  |                           |         |
| Insula, Inferior/Middle Frontal Gyrus, Claustrum, Striatum, Thalamus, Cingulate Gyrus  | 9, 13           | L/R | 19                                           | -11 | 6  | 38272                     | 13.26   |
| Medial Frontal Gyrus, Cingulate Gyrus, Pre/postcentral Gyrus, Inferior Parietal Lobule | 2, 4, 6, 24, 40 | R   | 25                                           | -19 | 53 | 24448                     | 13.13   |
| Anterior Cingulate, Medial/Superior Frontal Gyrus*                                     | 9, 10           | L/R | 2                                            | 48  | 19 | 23040                     | -12.44  |
| Medial Frontal Gyrus, Pre/postcentral Gyrus, Paracentral Lobule*                       | 3, 4, 6         | L   | -11                                          | -32 | 61 | 17920                     | -10.01  |
| Middle/Superior Temporal Gyrus, Inferior Parietal Lobule                               | 13, 37, 39      | R   | 51                                           | -43 | 19 | 12032                     | 10.04   |
| Posterior Cingulate, Precuneus, Cuneus*                                                | 18, 23, 29,     | L/R | 0                                            | -60 | 15 | 7552                      | -8.13   |
| Inferior Parietal Lobule, Parietal Lobule, Postcentral Gyrus                           | 40              | L   | -47                                          | -29 | 31 | 4928                      | 9.50    |
| Middle/Superior Frontal Gyrus*                                                         | 8               | L   | -17                                          | 28  | 47 | 4864                      | -6.66   |
| Angular Gyrus, Cuneus, Middle Temporal Gyrus                                           | 19, 39          | L   | -38                                          | -72 | 30 | 4416                      | -7.60   |
| Claustrum, Lentiform Nucleus, Putamen, Insula                                          | 13              | L   | -32                                          | 3   | 6  | 4160                      | 8.60    |

|                                      |    |   |     |     |     |      |       |
|--------------------------------------|----|---|-----|-----|-----|------|-------|
| Cingulate Gyrus*                     | 31 | R | 28  | -40 | 20  | 4032 | -7.12 |
| Insula, Parahippocampal Gyrus*       | 13 | L | -26 | -42 | 17  | 3328 | -7.11 |
| Inferior Semi-Lunar Lobule, Pyramis* | -  | L | -27 | -74 | -32 | 1472 | -7.50 |

° Whole brain,  $p < 0.001$ . All coordinates are Talairach coordinates (x, y, z). Cortical areas are based on Talairach Daemon software<sup>1</sup>.

\* Indicates that the region of interest displays significant deactivation during stimulation as compared to baseline.

### Reference List

1. Lancaster, J.L. *et al.* Automated Talairach atlas labels for functional brain mapping. *Hum Brain Mapp* **10**, 120-131 (2000).
